# Supplementary material
Source: publisher site journal article supplement (https://www.dovepress.com/article/405728)
Supplement: Supplementary file 1 [file get_supplementary_file.php]

**Supplementary material 1**

**Search strategy**

**Depression**

1. depress*

2. depressed

3. depression

4. depression [MeSH Terms]

5. depressive disorder [MeSH Terms]

6. despondent

7. antidepressant*

8. depressive

9. depressive [MeSH Terms]

10. OR / 1 – 9

**Acupuncture**

11. acupuncture [MeSH]

12. eletro-acupuncture

13. eletroacupuncture

14. needle

15. needling

16. OR / 11 – 15

**Combined search:**

#10 AND #16

Legend: MeSH indicates Medical Subject Heading in Pubmed.

**Supplementary material 2**

| **Number** | **Pattern identification** |
| --- | --- |
| 1 | Liver Qi stagnation |
| 2 | Heart and spleen deficiency |
| 3 | Qi stagnation and phlegm obstruction |
| 4 | Spleen and kidney Yang deficiency |
| 5 | Liver stagnation turning into fire |
| 6 | Yin deficiency of liver and kidney |
| 7 | Yin deficiency and fire |
| 8 | Stagnation of Qi turning into fire |
| 9 | Kidney deficiency and liver stagnation |
| 10 | Liver stagnation and spleen deficiency |
| 11 | Qi deficiency in the heart and gallbladder |
| 12 | Qi stagnation and blood stasis |
| 13 | Deficiency of liver and kidney |
| 14 | Phlegm-dampness internal obstruction |
| 15 | Fire in the heart and liver |
| 16 | Phlegm and fire disturbing the heart |
| 17 | Blood stasis |
| 18 | Deficiency of Qi and blood |
| 19 | Heat in Yangming |
| 20 | Fire in the heart |
| 21 | Qi deficiency with dampness |
| 22 | Qi deficiency and Yang blockage |
| 23 | Yang deficiency |
| 24 | Heart and mind deficiency |
| 25 | Heart-kidney Yin deficiency |
| 26 | Liver stagnation and phlegm obstruction |
| 27 | Qi and Yin deficiency of heart |
| 28 | Heart-kidney non-interaction |
| 29 | Qi deficiency and blood stasis |
| 30 | Qi deficiency with phlegm |
| 31 | Liver stagnation and phlegm-heat |
| 32 | Liver-stomach disharmony |
| 33 | Hyperactivity of liver Yang |

**Supplementary material 3**

**Acupoints used in various outcomes**

| **Outcomes** | **Acupoints and their frequency** |
| --- | --- |
| HAMD | GV20 (183), LR3 (152), PC6 (140), SP6 (138), HT7 (128), GV29 (124), ST36 (96), EX-HN1 (67), LI4 (62), BL15 (57), KI3 (55), BL20 (46), BL23 (45), BL18 (44), CV17 (40), GV24 (40), GB20 (37), GV26 (37), ST40 (30), LR2 (30) |
| MADRS | CV6 (1), CV12 (1), CV4 (1), CV10 (1), KI17 (1) |
| SDS | PC6 (4), GV20 (4), GV29 (4), GB20 (3), LI4 (2), LR3 (2), SP6 (2), HT7 (2), JLSXX-QX (2), ST36 (1), GV16 (1), PC8 (1), GV14 (1), CV6 (1), LR2 (1), CV12 (1), KI3 (1), CV4 (1), ST44 (1), GB43 (1) |
| Decrease the use of antidepressants | ST36 (6), SP6 (5), LR3 (4), HT7 (4), GV20 (3), PC6 (3), ST40 (3), GB20 (1), GB34 (1), EX-HN1 (1), BL17 (1), CV15 (1), GV20 (1), GV29 (1), GV24 (1), GV26 (1), PC5 (1), CV17 (1), PC9 (1), GB37 (1) |

Abbreviations: HAMD, Hamilton Depression Scale; MADRS, Montgomery and Asberg Depression Rating Scale; SDS, Self-Rating Depression Scale; GV, the Governor Vessel; BL, the Bladder Meridian of Foot Taiyang; LR, the Liver Meridian of Foot Jueyin; SP, the Spleen Meridian of Foot Taiyin; ST, the Stomach Meridian of Foot Yangming; PC, the Pericardium Meridian of Hand Jueyin; HT, the Heart Meridian of Hand Shaoyin; CV, the Conception Vessel; EX, the Extraordinary acupoints; GB, the Gallbladder Meridian of Foot Shaoyang; KI, the Kidney Meridian of Foot Shaoyin; LI, the Large Intestine Meridian of Hand Yangming.
